# Supplementary material for: Synthesis, Photophysics and Tunable Reverse Saturable Absorption of Bis-Tridentate Iridium(III) Complexes via Modification on Diimine Ligand
Source: MDPI journal article supplement (doi:10.3390/molecules28020566), 2023-01-05
Supplement: s1 [file s1]

# **Synthesis, Photophysics and Tunable Reverse Saturable Absorption of Bis-tridentate Iridium(III) Complexes *via* Modification on Diimine Ligand**

Guochang Li, Zhao Jiang, Meng Tang, Xiaoli Jiang, Houfu Tu, Senqiang Zhu\*, Rui Liu\* and Hongjun Zhu

*School of Chemistry and Molecular Engineering, Nanjing Tech University, Nanjing 211816, China*

## **1. Experimental section**

### **Materials**

All reagents were purchased from Sinopharm Chemical Reagent Co. Ltd and used as received unless otherwise mentioned. All the high-performance liquid chromatography (HPLC)-grade solvents used for spectroscopic study were without any further purification. Ultrapure water was used in the experiments and silica column chromatography was carried out on silica gel (200-300 mesh).

### **Measurements**

The ligands and complexes characterized by mass spectra and  $^1\text{H}$  NMR. High resolution-mass (HR-MS) spectra were measured on an AB Sciex X-500B QTOF-mass spectrometer, and  $^1\text{H}$  NMR spectra of the ligands and complexes in  $\text{CDCl}_3$  or  $\text{DMSO-}d_6$  solvent were measured on a Bruker Avance instrument, with tetramethylsilane for  $^1\text{H}$  NMR spectra as an internal standard.

UV-vis spectra were acquired on Persee-TU-1900 UV spectrophotometer. Fluorescence spectra were recorded on a Hitachi-F4600 fluorescence spectrophotometer. Quantum yields were obtained on an Edinburgh FS-5 fluorescence spectrometer. The nanosecond time-resolved transient difference absorption spectra were detected by Edinburgh analytical instruments (LP980, Edinburgh Instruments,

(U.K.). The emission lifetimes were collected using an Edinburgh ns-lifetime instrument with a 355 nm laser as the excited source. Before each measurement, the sample solutions were degassed with N<sub>2</sub> for 30 min.

The nonlinear transmission experiments for Ir(III) complexes were carried out in CH<sub>3</sub>CN solution in a 2 mm cuvette using 4.1 ns laser pulses. A Quantal Brilliant ns laser with a repetition rate of 10 Hz was used as the light source. The experimental setup and details have been described previously. An  $f = 10$  cm planoconvex lens was used to focus the beam to the sample cuvette. The radius of beam waist at the focal point is approximately 0.101 mm, measured by a knife edge. The linear transmission of the solution was adjusted to 80%, at 532 nm in the 2 mm cuvette.

#### Preparation of ligands

Ligands **L1-L5** are presented in **Scheme S1**.

6-phenyl-2,2'-bipyridine (**L1**). 6-bromo-2,2'-bipyridine (234 mg, 1 mmol), phenylboronic acid (122 mg, 1 mmol), Na<sub>2</sub>CO<sub>3</sub> (0.423 g, 4 mmol), toluene (30 mL) and water (10 mL) were added to a 100 mL round-bottom flask under nitrogen. The mixture was refluxed (95 °C) with stirred for 24 h, then cooled to room temperature. The residue was taken into H<sub>2</sub>O, extracted with ethyl acetate for three times. The remnant was dried over anhydrous Na<sub>2</sub>SO<sub>4</sub>, and concentrated. The mixture was purified by flash chromatography on a silica gel using petroleum ether and ethyl acetate (1:2, v/v) as the eluent to give white solid (255 mg, yield 75%). <sup>1</sup>H NMR (400 MHz, CDCl<sub>3</sub>)  $\delta$  8.68 (ddd,  $J = 4.9, 1.8, 0.9$  Hz, 3H), 7.72 (td,  $J = 7.7, 1.8$  Hz, 3H), 7.50 - 7.41 (m, 5H), 7.22 (ddd,  $J = 7.5, 4.8, 1.1$  Hz, 5H).

2-phenyl-1,10-phenanthroline (**L2**). 2-chloro-1,10-phenanthroline (180 mg, 1 mmol), phenylboronic acid (122 mg, 1 mmol), Na<sub>2</sub>CO<sub>3</sub> (0.423 g, 4 mmol), toluene (30mL) and water (10 mL) were added to a 100 mL round-bottom flask under nitrogen. The mixture was refluxed (95 °C) with stirred for 24 h, then cooled to room temperature. The residue was taken into H<sub>2</sub>O, extracted with ethyl acetate for three times. The remnant was dried over anhydrous Na<sub>2</sub>SO<sub>4</sub>, and concentrated. The mixture was purified by flash chromatography on a silica gel using petroleum ether and ethyl acetate (1:2,

v/v) as the eluent to give white solid (205 mg, yield 73%). <sup>1</sup>H NMR (400 MHz, CDCl<sub>3</sub>) δ 9.24 (dd, *J* = 4.3, 1.5 Hz, 1H), 8.35 (dd, *J* = 5.2, 3.3 Hz, 2H), 8.32 - 8.20 (m, 2H), 8.09 (d, *J* = 8.4 Hz, 1H), 7.78 (q, *J* = 8.8 Hz, 2H), 7.63 (dd, *J* = 8.0, 4.4 Hz, 1H), 7.55 (t, *J* = 7.5 Hz, 2H), 7.51 - 7.42 (m, 1H).

6-(9,9-dioctyl-9H-fluoren-2-yl)-2,2'-bipyridine (**L3**). 2-(9,9-dioctyl-9H-fluoren-2-yl)-4,4,5,5-tetramethyl-1,3,2-dioxaborolane (516 mg, 1 mmol), 6-bromo-2,2'-bipyridine (234mg, 1 mmol), Na<sub>2</sub>CO<sub>3</sub> (0.423g, 4 mmol), toluene (30 mL) and water (10 mL) were added to a 100 mL round-bottom flask under nitrogen. The mixture was refluxed (95 °C) with stirred for 24 h, then cooled to room temperature. The residue was taken into H<sub>2</sub>O, extracted with ethyl acetate for three times. The remnant was dried over anhydrous Na<sub>2</sub>SO<sub>4</sub>, and concentrated. The mixture was purified by flash chromatography on a silica gel using petroleum ether and ethyl acetate (4:1, v/v) as the eluent to give yellow liquid (535 mg, yield 70%). <sup>1</sup>H NMR (400 MHz, CDCl<sub>3</sub>) δ 8.74 - 8.64 (m, 2H), 8.37 (d, *J* = 7.7 Hz, 1H), 8.20 - 8.07 (m, 2H), 7.93 - 7.83 (m, 2H), 7.81 (d, *J* = 7.8 Hz, 2H), 7.75 (d, *J* = 7.4 Hz, 1H), 7.41 (d, *J* = 7.0 Hz, 1H), 7.38 - 7.28 (m, 3H), 2.18 - 1.97 (m, 4H), 0.92 - 0.50 (m, 30H).

6-(7-([2,2'-bipyridin]-6-yl)-9,9-dioctyl-9H-fluoren-2-yl)-2-butyl-1H-benzo[de]isoquinoline-1,3(2H)-dione (**L4**). 2-butyl-6-(9,9-dioctyl-7-(4,4,5,5-tetramethyl-1,3,2-dioxaborolan-2-yl)-9H-fluoren-2-yl)-1H-benzo[de]isoquinoline-1,3(2H)-dione (692 mg, 1 mmol), 6-bromo-2,2'-bipyridine (234 mg, 1 mmol), Na<sub>2</sub>CO<sub>3</sub> (0.423 g, 4 mmol), toluene (30 mL) and water (10 mL) were added to a 100 mL round-bottom flask under nitrogen. The mixture was refluxed (95 °C) with stirred for 24 h, then cooled to room temperature. The residue was taken into H<sub>2</sub>O, extracted with ethyl acetate for three times. The remnant was dried over anhydrous Na<sub>2</sub>SO<sub>4</sub>, and concentrated. The mixture was purified by flash chromatography on a silica gel using petroleum ether and ethyl acetate (4:1, v/v) as the eluent to give yellow liquid (788 mg, yield 68%). <sup>1</sup>H NMR (400 MHz, CDCl<sub>3</sub>) δ 8.75 - 8.63 (m, 4H), 8.40 (d, *J* = 7.6 Hz, 1H), 8.32 (dd, *J* = 13.6, 4.7 Hz, 1H), 8.23 (d, *J* = 8.1 Hz, 1H), 8.19 (d, *J* = 5.4 Hz, 1H), 7.96 - 7.90 (m, 3H), 7.86 (dd, *J* = 13.5, 7.6 Hz, 2H), 7.75 - 7.66 (m, 2H), 7.53 (t, *J* = 4.6 Hz, 1H), 7.49 (dd, *J* = 7.7, 4.2 Hz, 1H), 7.39 - 7.33 (m, 1H), 4.32 - 4.18 (m, 2H),

2.25 - 2.03 (m, 4H), 1.82 - 1.71 (m, 2H), 1.49 (dd,  $J = 15.1, 7.5$  Hz, 2H), 1.00 (dd,  $J = 15.5, 8.1$  Hz, 3H), 0.91 - 0.51 (m, 30H).

9-(7-([2,2'-bipyridin]-6-yl)-9,9-dioctyl-9H-fluoren-2-yl)-3,6-di-tert-butyl-9H-carbazole (**L5**). 3,6-di-tert-butyl-9-(9,9-dioctyl-7-(4,4,5,5-tetramethyl-1,3,2-dioxaborolan-2-yl)-9H-fluoren-2-yl)-9H-carbazole (792 mg, 1 mmol), 6-bromo-2,2'-bipyridine (234 mg, 1 mmol),  $\text{Na}_2\text{CO}_3$  (0.423 g, 4 mmol), toluene (30 mL) and water (10 mL) were added to a 100 mL round-bottom flask under nitrogen. The mixture was refluxed (95°C) with stirred for 24 h, then cooled to room temperature. The residue was taken into  $\text{H}_2\text{O}$ , extracted with ethyl acetate for three times. The remnant was dried over anhydrous  $\text{Na}_2\text{SO}_4$ , and concentrated. The mixture was purified by flash chromatography on a silica gel using petroleum ether and ethyl acetate (4:1, v/v) as the eluent to give white solid (771 mg, yield 65%).  $^1\text{H}$  NMR (400 MHz,  $\text{CDCl}_3$ )  $\delta$  9.29 (d,  $J = 23.5$  Hz), 8.85 - 8.74 (m, 1H), 8.40 - 8.28 (m, 2H), 8.21 (d,  $J = 8.4$  Hz, 1H), 8.17 (t,  $J = 2.4$  Hz, 2H), 8.10 (t,  $J = 7.6$  Hz, 1H), 7.97 (d,  $J = 8.0$  Hz, 1H), 7.87 (d,  $J = 8.7$  Hz, 1H), 7.83 - 7.76 (m, 1H), 7.67 (dd,  $J = 5.9, 4.7$  Hz, 1H), 7.60 (d,  $J = 1.4$  Hz, 1H), 7.53 (d,  $J = 6.4$ , 2H), 7.50 - 7.43 (m, 2H), 7.39 - 7.30 (m, 2H), 2.20 (d,  $J = 15.2, 5.0$  Hz, 2H), 2.09 - 1.98 (m, 2H), 1.48 (s, 18H), 1.02 - 0.50 (m, 30H).

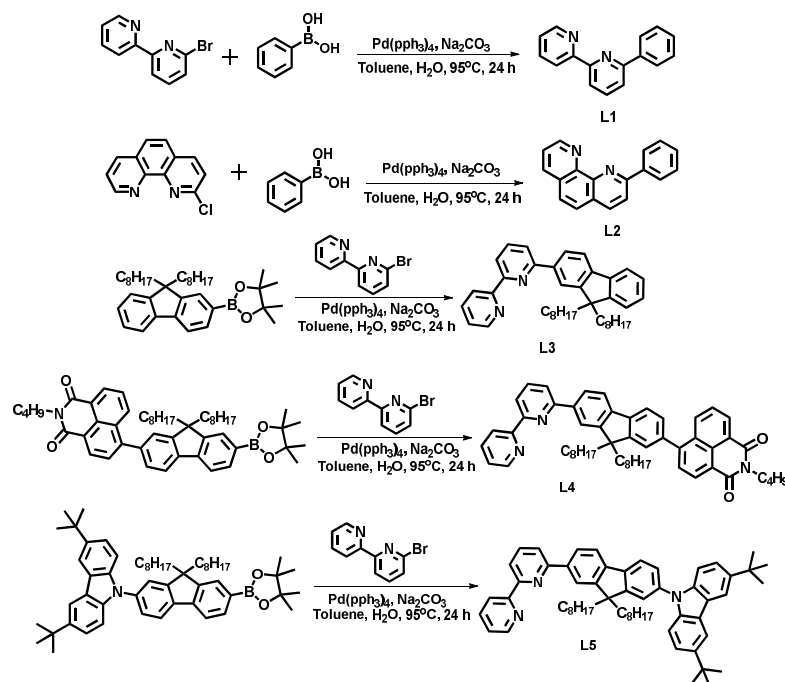

**Scheme S1.** The molecular structures and synthetic route to ligands **L1-L5**

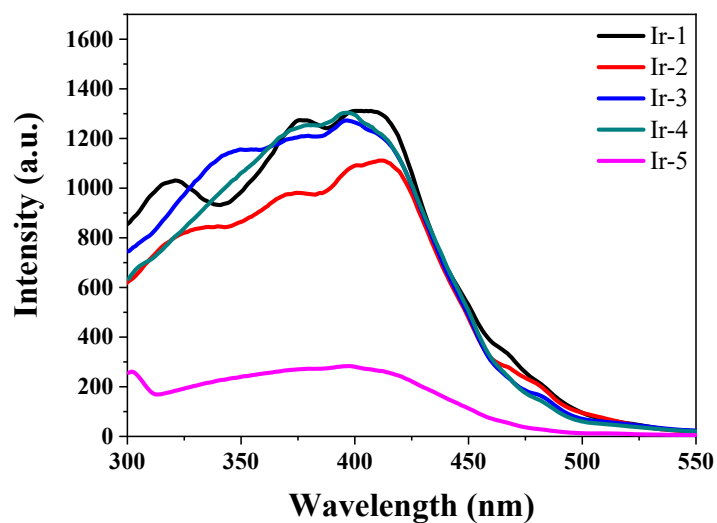

**Figure S1.** The excitation spectra of complexes Ir-1-Ir-5 in CH<sub>3</sub>CN.

**Table S1.** Contribution of fragments in Ir complexes.

|             |                                        | Contribution (%) |       |
|-------------|----------------------------------------|------------------|-------|
|             | Fragment                               | HOMO             | LUMO  |
| <b>Ir-1</b> | Ir                                     | 31.9             | 3.51  |
|             | Bipyrdine                              | 3.69             | 90.4  |
|             | Benzene                                | 3.56             | 0.72  |
|             | N <sup>^</sup> C <sup>^</sup> N ligand | 60.8             | 5.37  |
| <b>Ir-2</b> | Ir                                     | 30.8             | 3.54  |
|             | Phenanthroline                         | 3.52             | 94.5  |
|             | Benzene                                | 3.51             | 1.14  |
|             | N <sup>^</sup> C <sup>^</sup> N ligand | 62.17            | 0.82  |
| <b>Ir-3</b> | Ir                                     | 6.04             | 3.47  |
|             | Bipyrdine                              | 9.60             | 94.9  |
|             | Fluorene                               | 80.0             | 0.75  |
|             | N <sup>^</sup> C <sup>^</sup> N ligand | 4.36             | 0.88  |
| <b>Ir-4</b> | Ir                                     | 0.64             | 3.50  |
|             | Bipyrdine                              | 3.01             | 94.81 |
|             | Fluorene                               | 31.1             | 0.78  |
|             | Naphthalimide                          | 65.0             | 0.01  |
|             | N <sup>^</sup> C <sup>^</sup> N ligand | 0.25             | 0.90  |
| <b>Ir-5</b> | Ir                                     | 0.05             | 3.47  |
|             | Bipyrdine                              | 1.00             | 94.9  |
|             | Fluorene                               | 12.9             | 0.76  |
|             | Carbazole                              | 84.7             | 0.01  |
|             | N <sup>^</sup> C <sup>^</sup> N ligand | 1.34             | 0.86  |

## $^1\text{H}$ NMR spectra and mass spectrometry

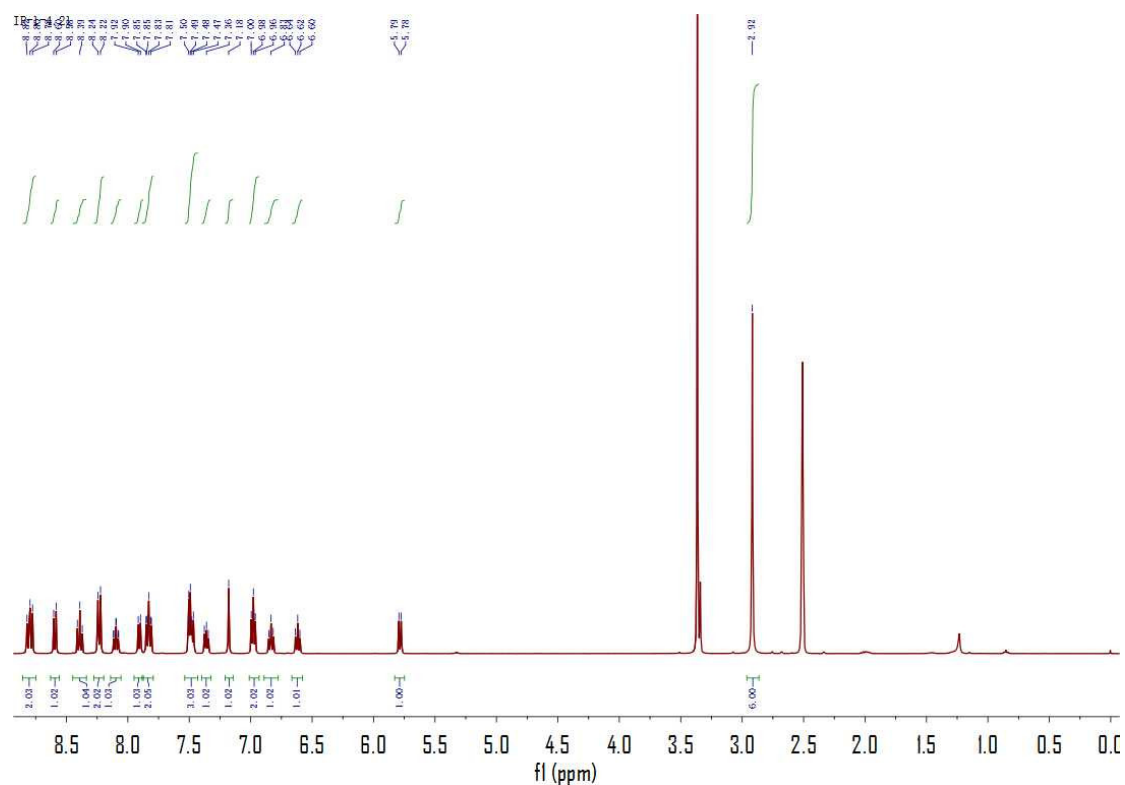

00055 #18 RT: 0.27 AV: 1 NL: 6.72E7  
T: FTMS + p ESI Full ms [150.00-2000.00]

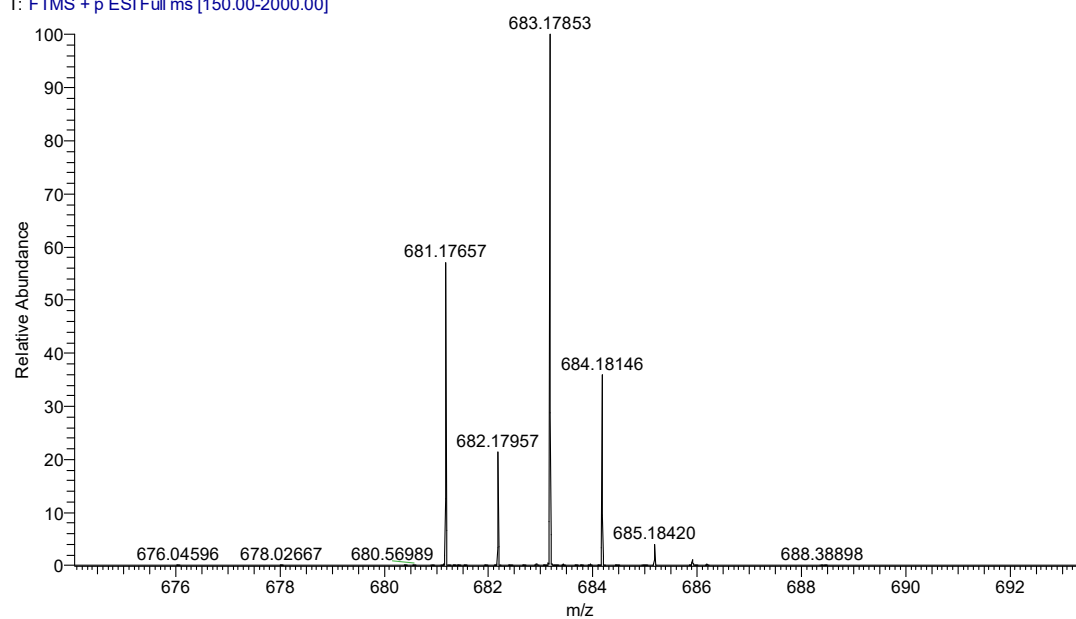

**Figure. S2**  $^1\text{H}$  NMR spectra (up) and mass spectrometry (down) of Ir-1

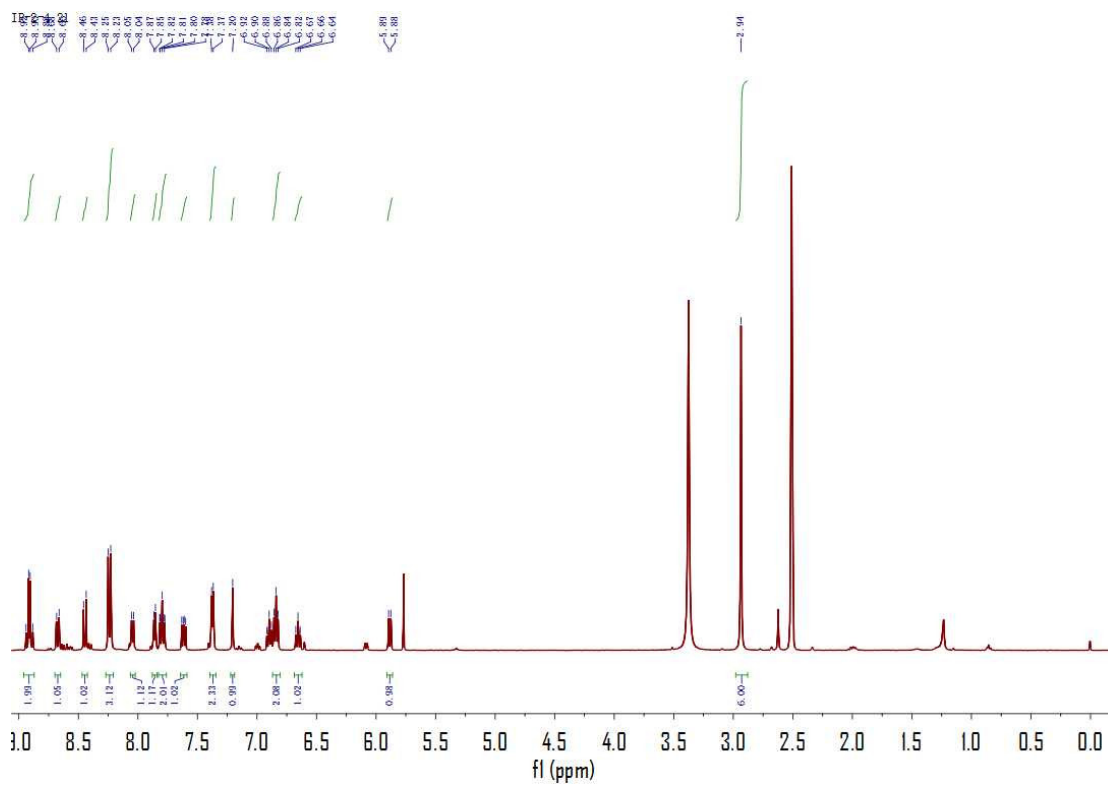

00056 #16 RT: 0.23 AV: 1 NL: 2.49E7  
T: FTMS + p ESI Full ms [150.00-2000.00]

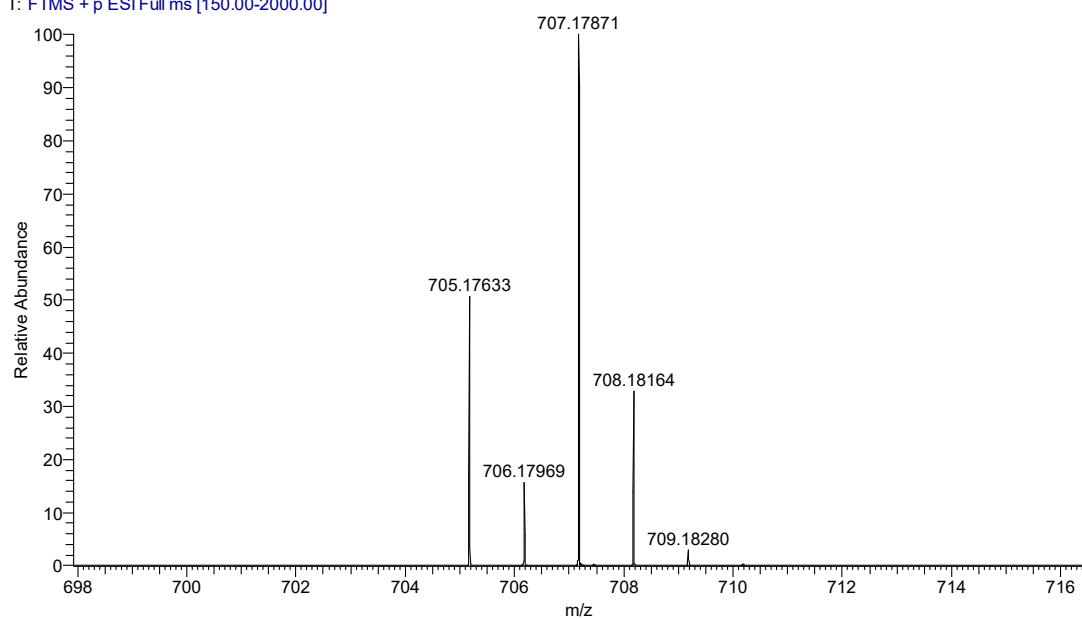

**Figure. S3** <sup>1</sup>H NMR spectra (up) and mass spectrometry (down) of Ir-2





IR-5-4.21

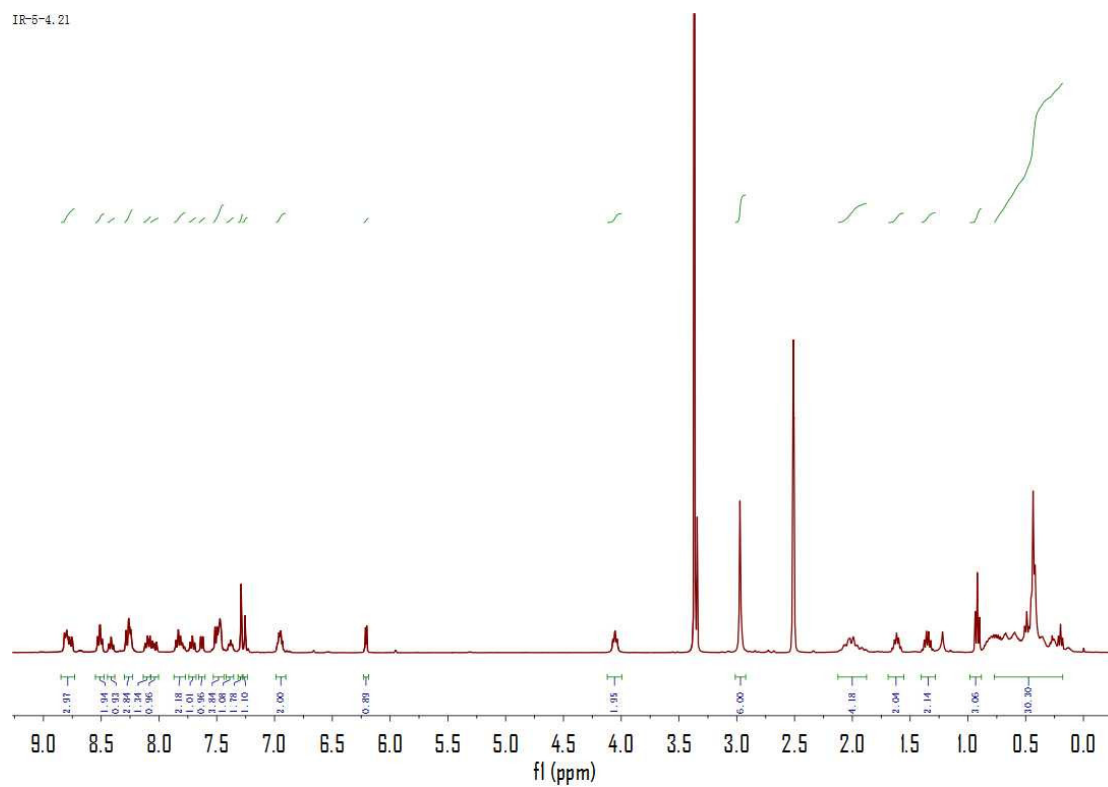

00059 #17 RT: 0.24 AV: 1 NL: 4.51E7  
T: FTMS + p ESI Full ms [150.00-2000.00]

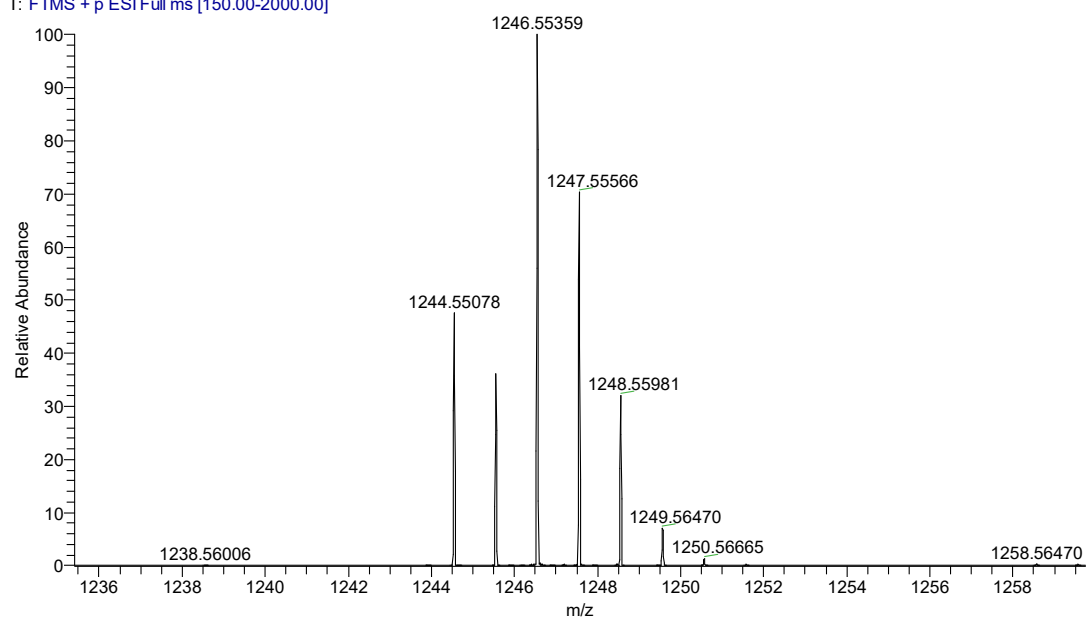

**Figure. S5** <sup>1</sup>H NMR spectra (up) and mass spectrometry (down) of Ir-4
